# Supplementary material for: Screening and Analysis of the Marker Components in Ganoderma lucidum by HPLC and HPLC-MSn with the Aid of Chemometrics
Source: Molecules. 2017 Apr 6;22(4):584. doi: 10.3390/molecules22040584 (PMC6154496; doi:10.3390/molecules22040584)
Supplement: Supplementary file 1 [file molecules-22-00584-s001.xlsx]

## Sheet: Sheet1
产地	1	2	3	4	5	6	7	8	9	10	11	12	13	14	15	16	17	18	19	20	21	22	23	24	25	26	27	28	29	30	31	32	33	34	35	36	37
S1	520110	65725	718935	1526860	119424	34663	631420	348486	1338741	2232579	1537079	359041	112032	1582040	2445780	1178280	128720	263030	788336	918500	334240	566394	574525	200609	113196	159338	367936	456644	139244	1183383	176632	187000	125967	230317	733541	535726	262666
S1-2	518931	67923	723921	1490322	118923	35663	642932	362424	1380932	2335678	1523822	378210	120942	1532032	2478342	1187290	127920	265427	788290	918729	334529	566289	572878	200780	113208	159203	378928	457289	138290	1183470	178360	189280	125639	236790	733680	537820	267669
S1-3	532921	62932	709832	1536671	120862	33679	630923	345291	1369212	2190421	1529580	368231	113908	1579322	2467321	1198202	123670	267819	788256	918320	332678	566340	573290	200378	113489	159203	375891	462901	139870	1184560	177980	188360	125780	234879	736890	538920	268390
S2	517300	235921	451727	2215852	155870	85987	428415	351744	1054288	1768010	1481142	419991	943819	2089353	2142475	1021267	137860	436343	1006854	1016692	456164	706810	779475	153461	118617	159753	539624	398781	63183	880136	192673	107098	110509	339577	567084	412112	233644
S2-2	517890	237890	457820	2245289	155890	87290	435728	356728	1056299	1778290	1482901	419280	942678	2098476	2146289	1022398	138279	437802	1009820	1016229	457089	702983	778902	156292	118902	159280	538920	398920	63278	889029	193022	107201	111092	339820	568920	413009	233578
S2-3	518568	235670	454780	2267909	156087	86928	430987	350920	1055672	1769302	1490279	420879	946729	2097242	2148290	1027492	139083	432900	1008278	1029301	458098	709291	779028	158209	119024	160929	539820	392819	63290	889279	192908	108023	110987	339720	563829	412989	236780
S3	181923	12393	88531	172607	36923	35823	110932	110532	250942	389232	232983	70832	302176	270893	497466	382311	59301	140941	179023	240932	51983	110932	280932	47932	76093	46832	240923	209432	62755	279321	138093	57093	86083	120932	340943	279832	149496
S3-2	189230	12982	89023	178290	35782	33489	108029	109322	240932	379221	228901	71890	310093	257839	482901	399280	58092	134280	182030	260893	52980	102830	290230	49903	75203	45093	236830	213094	63293	280943	139304	58094	84340	113340	335890	290932	146932
S3-4	183701	13093	86923	179820	37923	34984	109232	120932	235403	367829	258392	72029	306892	260928	508321	400298	57930	130932	181290	250839	53209	108293	302932	48320	74239	44920	250942	219842	65904	290421	137902	59034	85930	119832	398031	289304	148930
S4	309415	136391	262932	670943	89907	47834	323494	113828	729323	1198322	958232	223563	589323	692955	1475098	903231	68943	243098	483493	619936	224394	483293	517922	83439	77133	82392	246832	259843	81896	592119	119323	75158	99093	119323	349483	249934	126985
S4-2	358232	140223	279423	698342	91240	49034	339854	120943	740943	1233422	979342	245025	624394	723293	1498352	924349	70342	255984	512842	653295	243249	503942	543942	87342	79320	86395	260359	269432	84324	623522	124204	79342	99999	121353	353895	251353	130941
S4-3	289432	135923	261492	612941	86249	48342	320934	110942	730934	1184242	938203	232932	590384	673842	1436732	873429	67349	249843	479342	638432	209439	473942	520934	84525	76943	83543	257345	257483	82342	603253	120932	77934	95302	116034	338920	248429	129842
S5	469016	222492	394529	2010333	144328	42713	406176	354256	964849	1542342	1336688	379685	839901	1398165	1690381	863750	145719	350608	896031	928315	374336	619233	698853	141300	104067	134259	468462	354179	54019	793017	162177	89668	89873	305173	517206	420304	213517
S5-2	468394	227834	392840	2019941	145203	42823	409348	356820	983402	1538935	1324942	382012	840294	1382042	1682334	879230	146239	372941	889230	910230	375230	620193	692420	142494	103492	135034	469342	355932	55583	803492	162943	90354	89320	305034	520943	422340	220392
S5-3	483922	221940	403922	2009841	144923	41950	410923	359025	978934	1583491	1339842	382032	842424	1390238	1692340	889230	147239	369230	890230	920392	376034	629182	689230	149234	104934	135934	472042	359853	55903	799802	162983	89340	90340	356934	513029	430924	219849
S6	474362	222801	412049	2076229	151927	51927	366947	324586	1005646	1563483	1362101	388672	864126	1938469	1984070	955935	130845	336648	917867	923525	381091	629426	685935	144010	103524	164490	502080	374239	60957	821495	176349	96234	95479	318835	306410	373519	228423
S6-2	478342	223023	420942	2093411	152330	51802	367094	325094	1002932	1582330	1374329	389201	864302	1940231	1982302	956239	133203	337820	923021	932011	382910	623919	683421	145210	103626	167820	503021	372192	60932	832341	177849	98402	97241	320334	305932	389432	229340
S6-3	479230	223923	418923	2098341	159230	52099	366049	326943	1002392	1578392	1372938	388920	873021	1932892	1992302	958239	132483	338920	914024	924024	387923	632193	683420	146738	103745	166492	502839	382011	60783	840245	179240	97802	96804	330239	340942	379324	228934
S7	653928	304491	595478	2800663	222256	39504	519504	427055	1362426	2199967	1873509	525793	1199705	1397873	2780609	1298804	188314	266022	1299363	1299363	161195	926386	1011202	207165	161797	202998	678551	499110	75858	1142172	255347	132858	128116	430936	748977	608726	298773
S7-2	683842	319342	609234	2822411	234324	40249	514834	429853	1394823	2213342	1893051	533821	1211943	1404545	2798532	1318432	189842	265832	1317423	1317427	164984	937241	1038428	208537	163923	208433	688432	509538	77734	1168343	261343	134742	132324	438321	759232	622321	302329
S7-3	668349	312309	584292	2843431	253532	40343	509322	419854	1378532	2223538	1868934	538452	1203532	1418535	2803585	1309242	187242	263424	1338428	1302382	163329	926237	1021932	206543	163829	209435	670342	504421	76039	1157352	260734	136822	131723	432328	762321	612381	284932
S8	80284	24051	45677	218458	57577	32230	182652	137553	400630	377024	216345	86973	189021	173489	1052750	331405	45638	647870	495341	71197	197060	392376	709880	74591	59209	208047	46135	100153	43481	105801	58427	29995	242041	97327	44244	66122	63835
S8-2	82842	25875	47732	232931	58942	33984	190422	141823	428421	397241	228341	89723	193842	176732	1092812	358321	46878	683841	499340	72231	199422	401834	728214	75942	60981	218934	48721	111421	45734	109241	61032	32093	258341	99821	45732	67829	66232
S8-3	80241	24895	45902	228433	56384	31923	188420	138742	410942	379231	220833	88231	190282	174023	1078241	389201	46372	657834	502421	71892	197892	392302	718421	75024	61843	217942	47823	109411	44723	110424	59023	30924	249052	98724	44893	66983	63789
S9	160651	690050	82683	274626	164632	48678	495423	93976	809860	570746	408760	222446	471688	436921	2217232	895489	91323	1044594	756014	1373505	441720	460220	1053569	110767	52356	259336	73929	125903	77081	92309	63518	29422	447703	37558	17198	88513	77087
S9-2	162921	692002	83239	278349	167238	49283	489230	94232	810232	582321	410232	223439	472311	434312	2129321	883412	92321	1045231	760123	1380211	452321	469322	1068232	111023	56242	264541	74324	129834	78234	91203	65923	28341	450324	37924	17823	89230	78023
S9-3	161892	692301	82492	273291	162839	48239	492102	93212	823211	579231	402321	229341	479231	439121	2293411	893201	91923	1098223	759323	1392311	443934	465932	1059342	110924	59214	259342	73924	120421	78021	92932	94032	29034	444934	38029	17920	89102	79032
S10	243142	162241	54731	386999	75420	68570	213743	95739	453800	410920	458528	444990	574963	378791	2726100	195233	82490	779997	757312	1436526	385161	696172	803000	74105	190587	169364	125974	1149910	147796	325611	71126	582715	216085	790828	139326	731952	54680
S10-2	257231	172492	55834	394241	75639	69340	209432	96231	460231	420414	460943	450942	559423	389421	2694324	198042	82320	780432	769323	1474292	392321	683219	813023	75934	189420	177042	128094	1150242	149428	332442	72432	593402	229345	804241	138064	749422	55034
S10-3	243411	169234	53283	389203	77349	68934	219043	95894	459842	419032	449842	473432	567489	394342	2709434	194242	83792	789232	773211	1458232	379231	693201	802420	77832	194242	174242	127432	1149231	148242	329421	75242	570432	219343	783412	137924	730242	54982
S11	644341	128346	838881	1711785	201686	86398	696263	411664	1279454	2381701	1718866	416359	1185571	1665489	2442024	1059917	137087	250665	821442	935846	351630	652300	727079	91980	128541	66333	414009	485317	97390	606961	170775	200727	137849	222676	816828	584819	297635
S11-2	650231	129293	842421	1726428	203283	87231	704212	432311	1299421	2423240	1722492	423422	1209342	1674832	2458343	1073422	138924	256438	826318	947324	359843	658341	730934	94342	130934	69834	432843	509352	99073	632734	178342	237432	139843	238742	836244	597342	318743
S11-3	651023	127943	850242	1702424	199240	86323	702482	428342	1283841	2418432	1720341	420492	1198420	1672492	2418532	1068342	136283	253934	819422	940342	355804	655843	728349	92742	129834	68734	420241	490542	98734	617432	173843	219348	138743	232094	823204	573424	308342
S12	963854	243215	452866	2213482	118248	98695	1180127	300231	310231	583503	118366	746010	20996	98261	3889132	1006140	19744	521238	521238	396873	579998	1842484	2212075	214124	472297	420872	688742	2410920	240662	1000414	197066	262730	810107	1274820	695653	253076	328237
S12-2	963441	250352	449032	2209421	119422	97924	1170422	310924	309092	590421	119024	759424	22323	97943	3870412	1024241	18943	530124	520931	398431	564124	1804221	2309141	228935	480432	410532	684240	2409841	240941	1094114	197535	254241	804241	1285193	680421	248934	310942
S12-3	970342	243925	458324	2194823	117924	99840	1190242	309241	320234	579424	117924	769424	21984	99840	3890241	1024242	19192	529853	521043	389241	553481	1810292	2453952	230943	469342	428952	698942	2419841	238943	1043489	198341	243532	823101	1268035	670241	239034	309421
S13	329383	303875	160608	695216	387680	88686	474701	429243	782612	445598	406420	460188	266347	848611	3141058	822827	92093	1669969	1130165	1412975	668117	1867143	848328	147353	294508	267310	234176	1868192	246973	193410	164360	506038	259802	242756	1408233	1506882	277469
S13-2	310924	310942	159042	680411	370412	86942	409342	410942	769234	430935	410942	470320	278429	853205	3142041	810441	91204	1672491	1089242	1389422	674294	1794242	849432	148924	289420	265393	231904	1870432	235530	189342	165294	509421	250953	241495	1410954	1490321	274249
S13-3	309241	319321	160842	670242	392421	87241	428321	409212	770984	469823	424092	493214	298341	832041	3094241	823103	93042	1682422	1092412	1390314	609841	1892420	850342	140923	290242	259042	214204	1880422	239034	191024	169002	510953	249094	250952	1399023	1524204	262354
S14	557172	291048	117782	1515245	87360	63289	182827	456769	709413	328676	1607580	609444	111377	960658	3805813	2124533	196037	87491	365703	2237498	452820	1233419	285471	274993	234847	300363	144074	2858262	130965	373052	142643	643915	630797	234984	905517	1627992	258871
S14-2	550923	289421	117942	1498420	88204	62934	181094	467321	710952	310942	1590424	590421	110942	950242	3794201	2103952	198042	88049	358932	2398941	498344	1229348	298453	289343	241095	310941	146822	2863532	131923	369421	141423	653942	649341	240985	910942	1610322	250424
S14-3	549042	290341	119042	1509420	89240	64294	180249	470232	709342	309424	1612892	610422	109421	960248	3802114	2093531	197824	87492	378311	2492401	478342	1243948	280943	280432	239842	309421	149832	2898432	132342	390421	143982	649420	639053	239854	894204	1609421	251095
S15	48047	28942	36405	123639	59721	20680	160886	54301	250981	240982	108066	44797	161882	280719	321532	315275	17869	150972	316782	173241	85421	390381	467528	18039	72528	94201	59904	77877	43202	84249	15583	30854	55093	23039	32050	24656	89425
S15-2	49032	28932	39023	130922	69482	22489	157923	57923	279231	268302	132032	49321	170232	293113	302311	352351	15932	159232	332321	179231	89230	421401	493821	19094	73213	95241	63923	79241	45231	89241	16241	31230	56924	28034	33029	27921	93231
S15-3	51092	26739	37942	120942	61983	18932	162329	62311	239853	232932	110293	47392	167232	270321	330944	332321	16923	155921	309232	178239	87923	410942	473922	18920	76043	91414	60942	78024	42094	85042	15821	28094	54034	22094	30924	23904	88672
										1
